# Supplementary material for: A thin all-elastomeric capacitive pressure sensor array based on micro-contact printed elastic conductors
Source: Royal Society of Chemistry journal article supplement (doi:10.1039/c4tc00392f), 2014-01-01
Supplement: c4tc00392f1.pdf [file c4tc00392f1.pdf]

Supplementary Information for

## **Thin All-Elastomeric Capacitive Pressure Sensor Array Based on Micro Contact Printed Elastic Conductors**

Su-Jeong Woo,<sup>a</sup> Jeong-Ho Kong,<sup>a</sup> Dae-Gon Kim<sup>b</sup> and Jong-Man Kim<sup>\*a,b</sup>

<sup>a</sup> *Department of Nano Fusion Technology, Pusan National University, Busan 609-735, Republic of Korea. E-mail: [jongkim@pusan.ac.kr](mailto:jongkim@pusan.ac.kr)*

<sup>b</sup> *Department of Nanomechatronics Engineering, Pusan National University, Busan 609-735, Republic of Korea.*

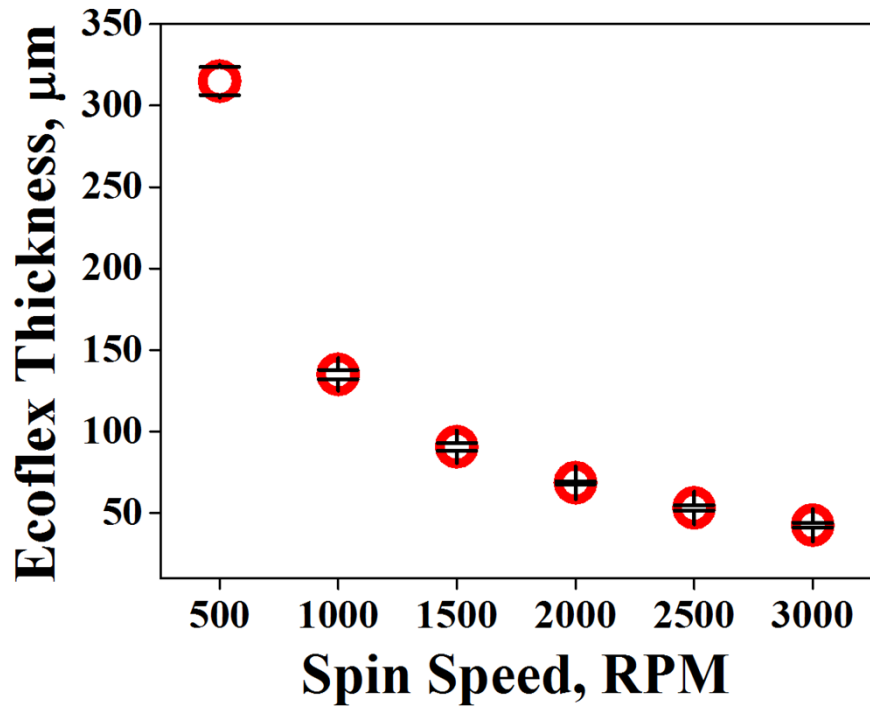

Fig. S1 Thickness variations of Ecoflex layer as a function of spin speed.

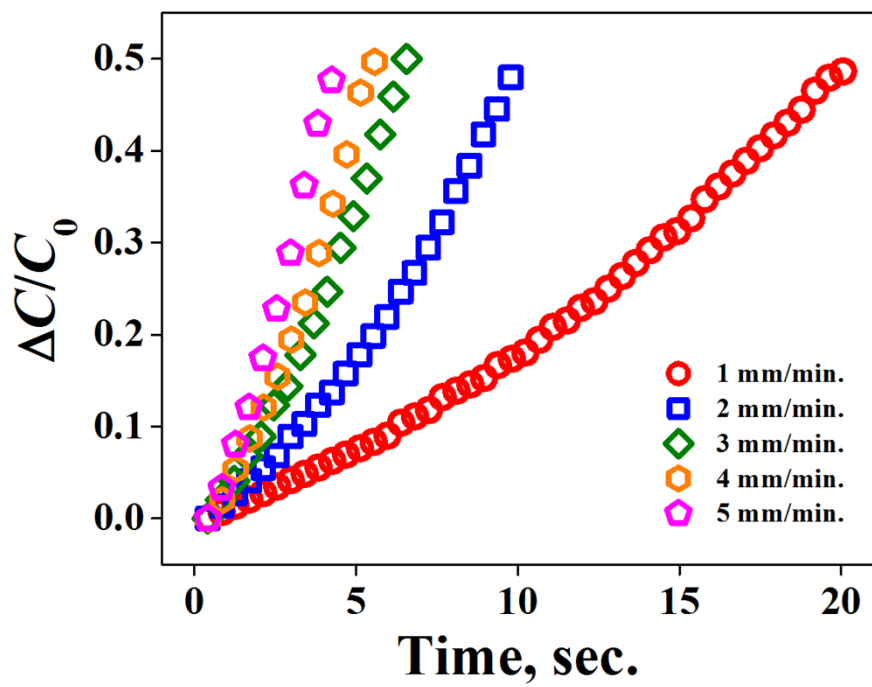

Fig. S2 Slopes in capacitance change ratio under various loading speeds with fixed maximum loading pressure of  $\sim 0.8$  Mpa.
